# Supplementary material
Source: PubMed Central journal article supplement (PMC3801065)
Supplement: 1309119110_pnas.201309119SI.pdf [file 1309119110_pnas.201309119SI.pdf]

# Supporting Information

Clausen et al. 10.1073/pnas.1309119110

## SI Materials and Methods

**Reagents.** Deoxyribonucleoside triphosphates were from Sigma. Labeled  $\gamma$ [32P] ATP was from Perkin-Elmer. All other reagents were of analytical grade and from Fluka, Sigma, or Merck. Gel-purified oligonucleotides were from Oligos Etc. Nonhydrolyzable dUMPNPP was from Jena Bioscience.

**DNA Polymerases.** WT yeast DNA polymerase (Pol)  $\delta$  and Pol  $\epsilon$  were purified as described previously (1, 2). RB69 Pol and its L415F variant were expressed and purified as described previously (3). In these studies, the RB69 Pol used were exonuclease deficient (D222A/D327A).

**Bypass Assays.** For Pol  $\delta$ , the reaction mixture contained 20 mM Tris-HCl (pH 7.8), 200  $\mu$ g/mL BSA, 1 mM DTT, 90 mM NaCl, 8 mM Mg acetate, 400 nM proliferating cell nuclear antigen (PCNA), 5 nM Pol  $\delta$ , 100 nM primer template 1–5 (Table S1), 16  $\mu$ M dATP, 30  $\mu$ M dTTP, 12  $\mu$ M dGTP, and 14  $\mu$ M dCTP. For four-subunit Pol  $\epsilon$ , the reaction mixture contained 40 mM Tris-HCl (pH 7.8), 200  $\mu$ g/mL BSA, 1 mM DTT, 100 mM NaCl, 8 mM Mg acetate, 1 nM Pol  $\epsilon$ , 100 nM primer template 1–5 (Table S1), 16  $\mu$ M dATP, 30  $\mu$ M dTTP, 12  $\mu$ M dGTP, and 14  $\mu$ M dCTP. For RB69 Pol or L415F RB69 Pol, the reaction mixture contained 25 mM Tris-HCl (pH 7.5), 2 mM DTT, 150 mM potassium acetate, 5 mM MgCl<sub>2</sub>, 100 pM of either RB69 Pol or L415F RB69 Pol, 100 nM primer template 6–10 (Table S1), and 10  $\mu$ M dNTPs. All components except the polymerase were mixed on ice and incubated at 37 °C for 2 min. The polymerase was added to initiate reactions, which were terminated after 0, 4, 8, and 12 min. These mixtures were heated at 95 °C for 3 min, and the DNA products were separated by electrophoresis through a 12% (wt/vol) denaturing polyacrylamide gel. A PhosphorImager was used to visualize the DNA products, which were quantified using Image Quant software from Molecular Dynamics. Termination and bypass probabilities were calculated as described previously (4). Termination probability at any template position is defined as the band intensity at that position divided by the intensity at that position plus all longer products. Bypass probability is defined as the band intensity at the +1 position plus all longer products divided by the intensity at the –1 position plus all longer products. In this study, –1 precedes the first ribonucleotide encountered. Relative bypass efficiency is the bypass probability with the ribonucleotide-containing substrate divided with the bypass probability for the all-DNA substrate.

**Protein Crystallization.** Crystals of ternary complexes were formed using the vapor diffusion sitting drop method. The crystal for structure (all-DNA) in Table S2 was formed by mixing 2  $\mu$ L of the protein solution containing 74  $\mu$ M polymerase, 74  $\mu$ M primer template 11, and 1.3 mM dUMPNPP with 2  $\mu$ L of the reservoir solution containing 50 mM Tris-HCl, pH 7.5, 10% (vol/vol) PEG-350 monomethyl ether (MME), and 180 mM CaCl<sub>2</sub>. The crystal for structure (0) in Table S2 was formed by mixing 2  $\mu$ L of

the protein solution containing 74  $\mu$ M polymerase, 74  $\mu$ M primer template 12, and 1.6 mM dTTP with 2  $\mu$ L of the reservoir solution containing 50 mM Tris-HCl, pH 7.5, 10% (vol/vol) PEG-350 MME, and 220 mM CaCl<sub>2</sub>. The crystal for structure (–1) in Table S2 was formed by mixing 2  $\mu$ L of the protein solution containing 74  $\mu$ M polymerase, 74  $\mu$ M primer template 13, and 1.6 mM dTTP with 2  $\mu$ L of the reservoir solution containing 50 mM Tris-HCl, pH 7.0, 180 mM CaCl<sub>2</sub>, and 13% (vol/vol) PEG-350 MME. The crystal for structure (–2) in Table S2 was formed by mixing 2  $\mu$ L of the protein solution containing 74  $\mu$ M polymerase, 74  $\mu$ M primer template 14, and 1.6 mM dTTP with 2  $\mu$ L of the reservoir solution containing 50 mM Tris-HCl, pH 7.0, 180 mM CaCl<sub>2</sub>, and 19% (vol/vol) PEG-350 MME. The crystal for structure (–3) in Table S2 was formed by mixing 2  $\mu$ L of the protein solution containing 74  $\mu$ M polymerase, 74  $\mu$ M primer template 15, and 1.6 mM dTTP with 2  $\mu$ L of the reservoir solution containing 50 mM Tris-HCl, pH 7.5, 180 mM CaCl<sub>2</sub>, and 17.5% (vol/vol) PEG-350 MME. The crystal for structure (–1,0) in Table S2 was formed by mixing 2  $\mu$ L of the protein solution containing 74  $\mu$ M polymerase, 74  $\mu$ M primer template 16, and 1.6 mM dTTP with 2  $\mu$ L of the reservoir solution containing 50 mM Tris-HCl, pH 7.5, 180 mM CaCl<sub>2</sub>, and 16% (vol/vol) PEG-350 MME. The crystal for structure (–2,–1) in Table S2 was formed by mixing 2  $\mu$ L of the protein solution containing 74  $\mu$ M polymerase, 74  $\mu$ M primer template 17, and 1.6 mM dTTP with 2  $\mu$ L of the reservoir solution containing 50 mM Tris-HCl, pH 8.0, 180 mM CaCl<sub>2</sub>, and 16% (vol/vol) PEG-350 MME. For data collection, crystals were transferred into a cryo-solution containing 100 mM Tris-HCl, pH 7.0, 7.5, or 8.0, dependent on the crystallization conditions, 100 mM NaCl, 5% (vol/vol) glycerol, 220 mM CaCl<sub>2</sub>, and 30% (vol/vol) PEG-350 MME. All crystals were frozen in liquid nitrogen and then mounted on a goniometer in a cold stream of nitrogen gas at 95 K.

**Data Collection and Processing.** Data for structures all-DNA, (0), (–1), (–2), (–1,0), and (–2,–1) (designations in Table S1), were collected on a Saturn 92 charge-coupled device (CCD) area detector system mounted on a 007HF rotating anode generator equipped with VarimaxHF mirrors. Structure (–3) was collected at the Advanced Photon Source, Argonne National Laboratory, on the Southeast Regional Collaborative Access Team BM beam line, on a MAR225 CCD detector. All data were processed using the HKL2000 data processing software (5).

**Molecular Replacement and Refinement.** For all structures, the 3CQ8 coordinates were used as a starting model for refinement maintaining the same Rfree reflection test set (3). Model building was performed using iterative cycles of manual model building using the program COOT (6) and refinement with Phenix (7) with dihedral restraints turned off for the DNA and incoming nucleotide. The electron density maps were of sufficient quality to build most of the side chains, backbone, and DNA. The quality of the models was assessed using Molprobit (8), and all models were found to have good geometry.

- Burgers PM, Gerik KJ (1998) Structure and processivity of two forms of *Saccharomyces cerevisiae* DNA polymerase delta. *J Biol Chem* 273(31):19756–19762.
- Asturias FJ, et al. (2006) Structure of *Saccharomyces cerevisiae* DNA polymerase epsilon by cryo-electron microscopy. *Nat Struct Mol Biol* 13(1):35–43.
- Zhong X, Pedersen LC, Kunkel TA (2008) Characterization of a replicative DNA polymerase mutant with reduced fidelity and increased translesion synthesis capacity. *Nucleic Acids Res* 36(12):3892–3904.
- Kokoska RJ, McCulloch SD, Kunkel TA (2003) The efficiency and specificity of apurinic/aprimidinic site bypass by human DNA polymerase eta and *Sulfolobus solfataricus* Dpo4. *J Biol Chem* 278(50):50537–50545.
- Otwinowski Z, Minor W (1997) Processing of X-ray diffraction data collected in oscillation mode. *Macromol Crystallogr Pt A* 276:307–326.
- Emsley P, Cowtan K (2004) Coot: model-building tools for molecular graphics. *Acta Crystallogr D Biol Crystallogr* 60(Pt 12 Pt 1):2126–2132.
- Adams PD, et al. (2010) PHENIX: A comprehensive Python-based system for macromolecular structure solution. *Acta Crystallogr D Biol Crystallogr* 66(Pt 2):213–221.
- Chen VB, et al. (2010) MolProbity: All-atom structure validation for macromolecular crystallography. *Acta Crystallogr D Biol Crystallogr* 66(Pt 1):12–21.

**Table S1. Primer-templates used in this study**

| Primer-templates | Sequence                                                                                   | Figure                                          |
|------------------|--------------------------------------------------------------------------------------------|-------------------------------------------------|
| 1                | 5'-TCAGGTCTAACTACCGCGGACTGCT-3'<br>3'-AGTCCAGATTGTGATGGCCGCTGACGAATGGACACGGACATGGGATCTT-5' | 1 <i>A</i> and <i>B</i>                         |
| 2                | 5'-TCAGGTCTAACTACCGCGGACTGCT-3'<br>3'-AGTCCAGATTGTGATGGCCGCTGACGAATGGACACGGACATGGGATCTT-5' | 1 <i>A</i> and <i>B</i>                         |
| 3                | 5'-TCAGGTCTAACTACCGCGGACTGCT-3'<br>3'-AGTCCAGATTGTGATGGCCGCTGACGAATGGACACGGACATGGGATCTT-5' | 1 <i>A</i> and <i>B</i>                         |
| 4                | 5'-TCAGGTCTAACTACCGCGGACTGCT-3'<br>3'-AGTCCAGATTGTGATGGCCGCTGACGAATGGACACGGACATGGGATCTT-5' | 1 <i>A</i> and <i>B</i>                         |
| 5                | 5'-TCAGGTCTAACTACCGCGGACTGCT-3'<br>3'-AGTCCAGATTGTGATGGCCGCTGACGAATGGACACGGACATGGGATCTT-5' | 1 <i>A</i> and <i>B</i>                         |
| 6                | 5'-TCAGGTCTAACTACCGCGGACT-3'<br>3'-AGTCCAGATTGTGATGGCCGCTGACGAATGGACACGGACATGGGATCTT-5'    | 1 <i>C</i> and <i>D</i>                         |
| 7                | 5'-TCAGGTCTAACTACCGCGGACT-3'<br>3'-AGTCCAGATTGTGATGGCCGCTGACGAATGGACACGGACATGGGATCTT-5'    | 1 <i>C</i> and <i>D</i>                         |
| 8                | 5'-TCAGGTCTAACTACCGCGGACT-3'<br>3'-AGTCCAGATTGTGATGGCCGCTGACGAATGGACACGGACATGGGATCTT-5'    | 1 <i>C</i> and <i>D</i>                         |
| 9                | 5'-TCAGGTCTAACTACCGCGGACT-3'<br>3'-AGTCCAGATTGTGATGGCCGCTGACGAATGGACACGGACATGGGATCTT-5'    | 1 <i>C</i> and <i>D</i>                         |
| 10               | 5'-TCAGGTCTAACTACCGCGGACT-3'<br>3'-AGTCCAGATTGTGATGGCCGCTGACGAATGGACACGGACATGGGATCTT-5'    | 1 <i>C</i> and <i>D</i>                         |
| 11 (all-DNA)     | 5'-GCGGACTGCTTACC-3'<br>3'-GCGCCTGACGAATGGACA-5'                                           | 2 <i>B</i> , <i>E</i> , <i>H</i> , and <i>K</i> |
| 12 (0)           | 5'-GCGGACTGCTTACC-3'<br>3'-GCGCCTGACGAATGGACA-5'                                           | 2 <i>A-C</i>                                    |
| 13 (-1)          | 5'-GCGGACTGCTTACC-3'<br>3'-GCGCCTGACGAATGGACA-5'                                           | 2 <i>D-F</i>                                    |
| 14 (-2)          | 5'-GCGGACTGCTTACC-3'<br>3'-GCGCCTGACGAATGGACA-5'                                           | 2 <i>G-I</i>                                    |
| 15 (-3)          | 5'-GCGGACTGCTTACC-3'<br>3'-GCGCCTGACGAATGGACA-5'                                           | 2 <i>J-L</i>                                    |
| 16 (-1,0)        | 5'-GCGGACTGCTTACC-3'<br>3'-GCGCCTGACGAATGGACA-5'                                           | 3 <i>A-E</i>                                    |
| 17 (-2,-1)       | 5'-GCGGACTGCTTACC-3'<br>3'-GCGCCTGACGAATGGACA-5'                                           | 4 <i>A-F</i>                                    |

The number in parentheses refers to the position of the ribonucleotide in the template. Characters in bold face indicate the position of the ribonucleotide.

**Table S2. Crystallographic data collection and refinement statistics**

| PDB ID code                               | 4KHQ                                          | 4KHS                                          | 4KHU                                          | 4KHW                                          | 4KHY                                          | 4KI4                                          | 4KI6                                          |
|-------------------------------------------|-----------------------------------------------|-----------------------------------------------|-----------------------------------------------|-----------------------------------------------|-----------------------------------------------|-----------------------------------------------|-----------------------------------------------|
| Structure*                                | all-DNA                                       | 0                                             | -1                                            | -2                                            | -3                                            | -1,0                                          | -2,-1                                         |
| Primer template <sup>†</sup>              | 11                                            | 12                                            | 13                                            | 14                                            | 15                                            | 16                                            | 17                                            |
| Data collection                           |                                               |                                               |                                               |                                               |                                               |                                               |                                               |
| Space group                               | P2 <sub>1</sub> 2 <sub>1</sub> 2 <sub>1</sub> |
| Cell dimensions                           |                                               |                                               |                                               |                                               |                                               |                                               |                                               |
| a (Å)                                     | 80.66                                         | 80.69                                         | 80.98                                         | 80.36                                         | 80.80                                         | 80.73                                         | 80.85                                         |
| b (Å)                                     | 119.36                                        | 119.57                                        | 119.35                                        | 118.63                                        | 118.24                                        | 118.84                                        | 118.40                                        |
| c (Å)                                     | 128.07                                        | 127.80                                        | 127.86                                        | 126.31                                        | 127.61                                        | 127.52                                        | 127.97                                        |
| α, β, γ (°)                               | 90, 90, 90                                    | 90, 90, 90                                    | 90, 90, 90                                    | 90, 90, 90                                    | 90, 90, 90                                    | 90, 90, 90                                    | 90, 90, 90                                    |
| Resolution (Å)                            | 50.0–2.2                                      | 50.0–2.1                                      | 50.0–2.1                                      | 50.0–2.4                                      | 50.0–2.2                                      | 50.0–2.4                                      | 50.0–2.6                                      |
| R <sub>merge</sub> (%) <sup>‡</sup>       | 7.4 (52.0)                                    | 7.6 (46.8)                                    | 8.9 (50.3)                                    | 7.0 (45.3)                                    | 7.7 (58.2)                                    | 7.9(52.3)                                     | 6.2 (42.3)                                    |
| //σ <sup>‡</sup>                          | 11.9 (3.1)                                    | 13.3 (2.1)                                    | 8.8 (2.6)                                     | 9.7 (3.0)                                     | 10.4 (2.9)                                    | 8.8(2.5)                                      | 14.5 (2.4)                                    |
| Completeness (%) <sup>‡</sup>             | 99.9 (99.0)                                   | 99.9 (99.8)                                   | 97.9 (84.0)                                   | 98.7 (95.3)                                   | 98.4 (88.9)                                   | 99.8(97.3)                                    | 97.4 (86.2)                                   |
| Redundancy <sup>‡</sup>                   | 6.0 (5.2)                                     | 7.2 (6.0)                                     | 5.8 (3.9)                                     | 7.0 (4.4)                                     | 7.1 (5.8)                                     | 6.0(4.8)                                      | 4.9 (2.9)                                     |
| Refinement                                |                                               |                                               |                                               |                                               |                                               |                                               |                                               |
| Resolution (Å)                            | 2.2                                           | 2.1                                           | 2.1                                           | 2.4                                           | 2.2                                           | 2.4                                           | 2.6                                           |
| No. reflections                           | 64,171                                        | 69,508                                        | 73,809                                        | 48,447                                        | 57,059                                        | 45,787                                        | 39,756                                        |
| R <sub>work</sub> /R <sub>free</sub> (%)  | 17.9/21.3                                     | 17.6/21.6                                     | 20.5/24.0                                     | 17.2/22.4                                     | 19.7/23.3                                     | 19.2/22.1                                     | 19.5/23.3                                     |
| No. atoms                                 |                                               |                                               |                                               |                                               |                                               |                                               |                                               |
| Protein                                   | 7,345                                         | 7,234                                         | 7,296                                         | 7,274                                         | 7,337                                         | 7,247                                         | 7,106                                         |
| DNA                                       | 649                                           | 647                                           | 651                                           | 651                                           | 649                                           | 643                                           | 652                                           |
| Nucleotide                                | 28                                            | 29                                            | 29                                            | 29                                            | 29                                            | 29                                            | 29                                            |
| Solvent                                   | 589                                           | 672                                           | 596                                           | 544                                           | 574                                           | 426                                           | 182                                           |
| Overall Wilson B factor (Å <sup>2</sup> ) | 40.5                                          | 36.7                                          | 33.6                                          | 37.5                                          | 40.4                                          | 42.7                                          | 54.2                                          |
| B factors (Å <sup>2</sup> )               |                                               |                                               |                                               |                                               |                                               |                                               |                                               |
| Protein                                   | 44.8                                          | 42.4                                          | 38.0                                          | 42.8                                          | 45.9                                          | 43.3                                          | 62.0                                          |
| DNA                                       | 49.4                                          | 47.7                                          | 46.3                                          | 49.5                                          | 53.6                                          | 49.6                                          | 70.4                                          |
| Nucleotide                                | 30.2                                          | 27.9                                          | 23.8                                          | 28.2                                          | 30.5                                          | 28.6                                          | 45.6                                          |
| Solvent                                   | 47.4                                          | 46.2                                          | 39.1                                          | 41.7                                          | 47.2                                          | 40.4                                          | 55.1                                          |
| Root mean square deviations               |                                               |                                               |                                               |                                               |                                               |                                               |                                               |
| Bond length (Å)                           | 0.010                                         | 0.009                                         | 0.009                                         | 0.007                                         | 0.007                                         | 0.002                                         | 0.002                                         |
| Bond angles (°)                           | 0.724                                         | 0.815                                         | 0.890                                         | 0.764                                         | 0.731                                         | 0.685                                         | 0.652                                         |
| Ramachandran statistics <sup>§</sup>      |                                               |                                               |                                               |                                               |                                               |                                               |                                               |
| Favored regions (%)                       | 97.4                                          | 97.4                                          | 97.7                                          | 96.9                                          | 96.9                                          | 96.7                                          | 95.9                                          |
| Allowed regions (%)                       | 99.9                                          | 100                                           | 100                                           | 100                                           | 100                                           | 100                                           | 99.8                                          |

\*Ribonucleotide position in template.

<sup>†</sup>See Table S1.

<sup>‡</sup>Highest resolution shell is shown in parentheses.

<sup>§</sup>Values obtained using MolProbity (8).
